# Supplementary material for: Strain-specific strategies of 2′-fucosyllactose, 3-fucosyllactose, and difucosyllactose assimilation by Bifidobacterium longum subsp. infantis Bi-26 and ATCC 15697
Source: PubMed Central journal article supplement (PMC7522266; doi:10.1038/s41598-020-72792-z), 2020-09-28
Supplement: 41598_2020_72792_MOESM1_ESM.pdf [file 41598_2020_72792_MOESM1_ESM.pdf]

## SUPPLEMENTAL MATERIAL

*Supplementary Figures 1-4 and Supplementary Tables 1-3 for manuscript:*

### **Strain-Specific Strategies of 2'-Fucosyllactose, 3-Fucosyllactose, and Difucosyllactose Assimilation by *Bifidobacterium longum* subsp. *infantis* Bi-26 and ATCC 15697**

Bryan E Zabel<sup>1</sup>, Svetlana Gerdes<sup>1</sup>, Kara C Evans<sup>1</sup>, Derek Nedveck<sup>1</sup>, Suzanne Koch Singles<sup>2</sup>, Barbara Volk<sup>2</sup>, Charles Budinoff<sup>1</sup>

<sup>1</sup>Genomics & Microbiome Science, DuPont Nutrition & Biosciences, Madison, WI, USA

<sup>2</sup>Advanced Analytical, DuPont Nutrition & Biosciences, Wilmington, DE, USA

| Sample         | Strain     | Carbon Source | Control     | RNA Concentration (ng/uL) | Number of Reads | subsampled read number | aligned reads | unaligned reads |
|----------------|------------|---------------|-------------|---------------------------|-----------------|------------------------|---------------|-----------------|
| Bi-26_T1_3FL_A | Bi-26      | 3FL           | Bi-26_T1_NC | 38.44                     | 11377568        | 5000000                | 7740600       | 2259400         |
| Bi-26_T1_3FL_B | Bi-26      | 3FL           | Bi-26_T1_NC | 23.57                     | 12431150        | 5000000                | 8252389       | 1747611         |
| Bi-26_T2_3FL_A | Bi-26      | 3FL           | Bi-26_T2_NC | 102.58                    | 16230051        | 5000000                | 7770355       | 2229645         |
| Bi-26_T2_3FL_B | Bi-26      | 3FL           | Bi-26_T2_NC | 17.76                     | 11374518        | 5000000                | 8370200       | 1629800         |
| Bi-26_T3_3FL_A | Bi-26      | 3FL           | Bi-26_T2_NC | 32.00                     | 12184957        | 5000000                | 8116652       | 1883348         |
| Bi-26_T3_3FL_B | Bi-26      | 3FL           | Bi-26_T2_NC | 92.97                     | 12338227        | 5000000                | 8101526       | 1898474         |
| Bi-26_T1_2FL_A | Bi-26      | 2'FL          | Bi-26_T1_NC | 13.07                     | 14030434        | 5000000                | 9418727       | 581273          |
| Bi-26_T1_2FL_B | Bi-26      | 2'FL          | Bi-26_T1_NC | 100.26                    | 11550914        | 5000000                | 7741533       | 2258467         |
| Bi-26_T2_2FL_A | Bi-26      | 2'FL          | Bi-26_T2_NC | 96.09                     | 17227125        | 5000000                | 9326214       | 673786          |
| Bi-26_T2_2FL_B | Bi-26      | 2'FL          | Bi-26_T2_NC | 10.56                     | 13254370        | 5000000                | 8326915       | 1673085         |
| Bi-26_T3_2FL_A | Bi-26      | 2'FL          | Bi-26_T2_NC | 82.94                     | 13816879        | 5000000                | 8424651       | 1575349         |
| Bi-26_T3_2FL_B | Bi-26      | 2'FL          | Bi-26_T2_NC | 80.58                     | 14515764        | 5000000                | 9324944       | 675056          |
| Bi-26_T1_DFL_A | Bi-26      | DFL           | Bi-26_T1_NC | 9.58                      | 16118479        | 5000000                | 9320234       | 679766          |
| Bi-26_T1_DFL_B | Bi-26      | DFL           | Bi-26_T1_NC | 9.87                      | 13964078        | 5000000                | 9111017       | 888983          |
| Bi-26_T2_DFL_A | Bi-26      | DFL           | Bi-26_T2_NC | 77.02                     | 11530159        | 5000000                | 7932688       | 2067312         |
| Bi-26_T2_DFL_B | Bi-26      | DFL           | Bi-26_T2_NC | 29.07                     | 16465263        | 5000000                | 9444898       | 555102          |
| Bi-26_T3_DFL_A | Bi-26      | DFL           | Bi-26_T2_NC | 46.13                     | 11644676        | 5000000                | 7727185       | 2272815         |
| Bi-26_T3_DFL_B | Bi-26      | DFL           | Bi-26_T2_NC | 37.26                     | 12818912        | 5000000                | 8455592       | 1544408         |
| Bi-26_T1_LAC_A | Bi-26      | Lactose       | Bi-26_T1_NC | 10.59                     | 11773090        | 5000000                | 7883415       | 2116585         |
| Bi-26_T1_LAC_B | Bi-26      | Lactose       | Bi-26_T1_NC | 70.95                     | 13328524        | 5000000                | 9115290       | 884710          |
| Bi-26_T2_LAC_A | Bi-26      | Lactose       | Bi-26_T2_NC | 94.09                     | 15192742        | 5000000                | 9844605       | 155395          |
| Bi-26_T2_LAC_B | Bi-26      | Lactose       | Bi-26_T2_NC | 14.83                     | 11615198        | 5000000                | 8235262       | 1764738         |
| Bi-26_T3_LAC_A | Bi-26      | Lactose       | Bi-26_T2_NC | 29.68                     | 10767323        | 5000000                | 7151390       | 2848610         |
| Bi-26_T3_LAC_B | Bi-26      | Lactose       | Bi-26_T2_NC | 99.03                     | 12887162        | 5000000                | 8652072       | 1347928         |
| Bi-26_T1_NC_A  | Bi-26      | No carbo      | Control     | 2.93                      | 11887067        | 5000000                | 7286597       | 2713403         |
| Bi-26_T1_NC_B  | Bi-26      | No carbo      | Control     | 2.93                      | 11887067        | 5000000                | 8652010       | 1347990         |
| Bi-26_T2_NC_A  | Bi-26      | No carbo      | Control     | 8.13                      | 10238382        | 5000000                | 7256215       | 2743785         |
| Bi-26_T2_NC_B  | Bi-26      | No carbo      | Control     | 50.80                     | 14283924        | 5000000                | 8565450       | 1434550         |
| Type_T2_3FL_A  | ATCC 15697 | 3FL           | Type_T2_NC  | 32.87                     | 9655569         | 5000000                | 6717222       | 3282778         |
| Type_T2_3FL_B  | ATCC 15697 | 3FL           | Type_T2_NC  | 90.89                     | 13883429        | 5000000                | 7347634       | 2652366         |
| Type_T2_2FL_A  | ATCC 15697 | 2'FL          | Type_T2_NC  | 25.85                     | 11264287        | 5000000                | 7537164       | 2462836         |
| Type_T2_2FL_B  | ATCC 15697 | 2'FL          | Type_T2_NC  | 30.97                     | 13059233        | 5000000                | 7439038       | 2560962         |
| Type_T2_DFL_A  | ATCC 15697 | DFL           | Type_T2_NC  | TOO LOW                   | 12265619        | 5000000                | 7896696       | 2103304         |
| Type_T2_DFL_B  | ATCC 15697 | DFL           | Type_T2_NC  | TOO LOW                   | 12070465        | 5000000                | 6568626       | 3431374         |
| Type_T2_LAC_A  | ATCC 15697 | Lactose       | Type_T2_NC  | 40.65                     | 8955163         | 5000000                | 7880264       | 2119736         |
| Type_T2_LAC_B  | ATCC 15697 | Lactose       | Type_T2_NC  | 75.18                     | 11984846        | 5000000                | 7488110       | 2511890         |
| Type_T2_GLU_A  | ATCC 15697 | Glucose       | Type_T2_NC  | 5.87                      | 12054331        | 5000000                | 7522120       | 2477880         |
| Type_T2_GLU_B  | ATCC 15697 | Glucose       | Type_T2_NC  | 8.82                      | 17937551        | 5000000                | 7623448       | 2376552         |
| Type_T2_FUC_A  | ATCC 15697 | Fucose        | Type_T2_NC  | 3.87                      | 10070561        | 5000000                | 7725412       | 2274588         |
| Type_T2_FUC_B  | ATCC 15697 | Fucose        | Type_T2_NC  | 2.55                      | 11989395        | 5000000                | 7112358       | 2887642         |
| Type_T2_NC_A   | ATCC 15697 | No carbo      | Control     | 3.42                      | 12103669        | 5000000                | 7726618       | 2273382         |
| Type_T2_NC_B   | ATCC 15697 | No carbo      | Control     | TOO LOW                   | 11001749        | 5000000                | 7936382       | 2063618         |

**Supplemental Table 1:** RNA-seq quality statistics. Quality data for RNA concentration (qubit), number of reads generated, number of reads sampled and aligned are shown for all the samples. The controls that were used for comparison for RNA-seq is also listed.

| Locus ID  | Abbreviation     | Protein function                                                  |
|-----------|------------------|-------------------------------------------------------------------|
| n/a       | Aceto-hydroxybut | 2-aceto-2-hydroxybutanoate                                        |
| Blon_1961 | ADH              | Aldehyde dehydrogenase (EC 1.2.1.3)                               |
| Blon_2241 | ALH              | Alcohol dehydrogenase (EC 1.1.1.1)                                |
| Blon_2239 | ALDC             | Alpha-acetolactate decarboxylase (EC 4.1.1.5)                     |
| Blon_0399 | ALS_a            | Acetolactate synthase large subunit (EC 2.2.1.6)                  |
| Blon_0398 | ALS_b            | Acetolactate synthase small subunit (EC 2.2.1.6)                  |
| Blon_1731 | askA             | Acetate kinase (EC 2.7.2.1)                                       |
| Blon_1836 | Eno              | Enolase (EC 4.2.1.11)                                             |
| Blon_0538 | GalE             | UDP-glucose-4-epimerase (EC 5.1.3.2)                              |
| Blon_2062 | GalK             | Galactokinase (EC 2.7.1.6)                                        |
| Blon_2063 | GalT             | galT, Galactose-1-phosphate uridylyltransferase (EC 2.7.7.10)     |
| Blon_0565 | GLK              | Glucokinase (EC 2.7.1.2)                                          |
| Blon_0417 | GPI              | Glucose-6-phosphate isomerase (EC 5.3.1.9)                        |
| Blon_0131 | ilvC             | Ketol-acid reductoisomerase (NADP(+)) (EC 1.1.1.86)               |
| Blon_0136 | ilvC             | Ketol-acid reductoisomerase (NADP(+)) (EC 1.1.1.86)               |
| Blon_2134 | ilvD             | Dihydroxy-acid dehydratase (EC 4.2.1.9)                           |
| Blon_0540 | LAR              | Lactaldehyde reductase (EC 1.1.1.77) -- to 1,2PD                  |
| Blon_0840 | LDH              | L-lactate dehydrogenase (EC 1.1.1.27)                             |
| Blon_1090 | LDH              | L-lactate dehydrogenase (EC 1.1.1.27)                             |
| Blon_0059 | PEPC             | Phosphoenolpyruvate carboxylase (EC 4.1.1.31)                     |
| Blon_1715 | PFL              | Pyruvate formate-lyase (EC 2.3.1.54)                              |
| Blon_1714 | PFL_act          | Pyruvate formate-lyase activating enzyme (EC 1.97.1.4)            |
| Blon_2184 | PGM              | Phosphoglucomutase (EC 5.4.2.2)                                   |
| Blon_1730 | PTA              | Phosphate acetyltransferase (EC 2.3.1.8)                          |
| Blon_1745 | PyK              | Pyruvate kinase (EC 2.7.1.40)                                     |
| Blon_1095 | TAL              | Transaldolase (EC 2.2.1.2)                                        |
| Blon_1096 | TKL              | Transketolase (EC 2.2.1.1)                                        |
| Blon_1722 | XFP              | Xylulose-5P/Fructose-6P phosphoketolase (EC 4.1.2.9; EC 4.1.2.22) |

**Supplemental Table 2.** Gene names and protein functions for abbreviations used in Figure 2.

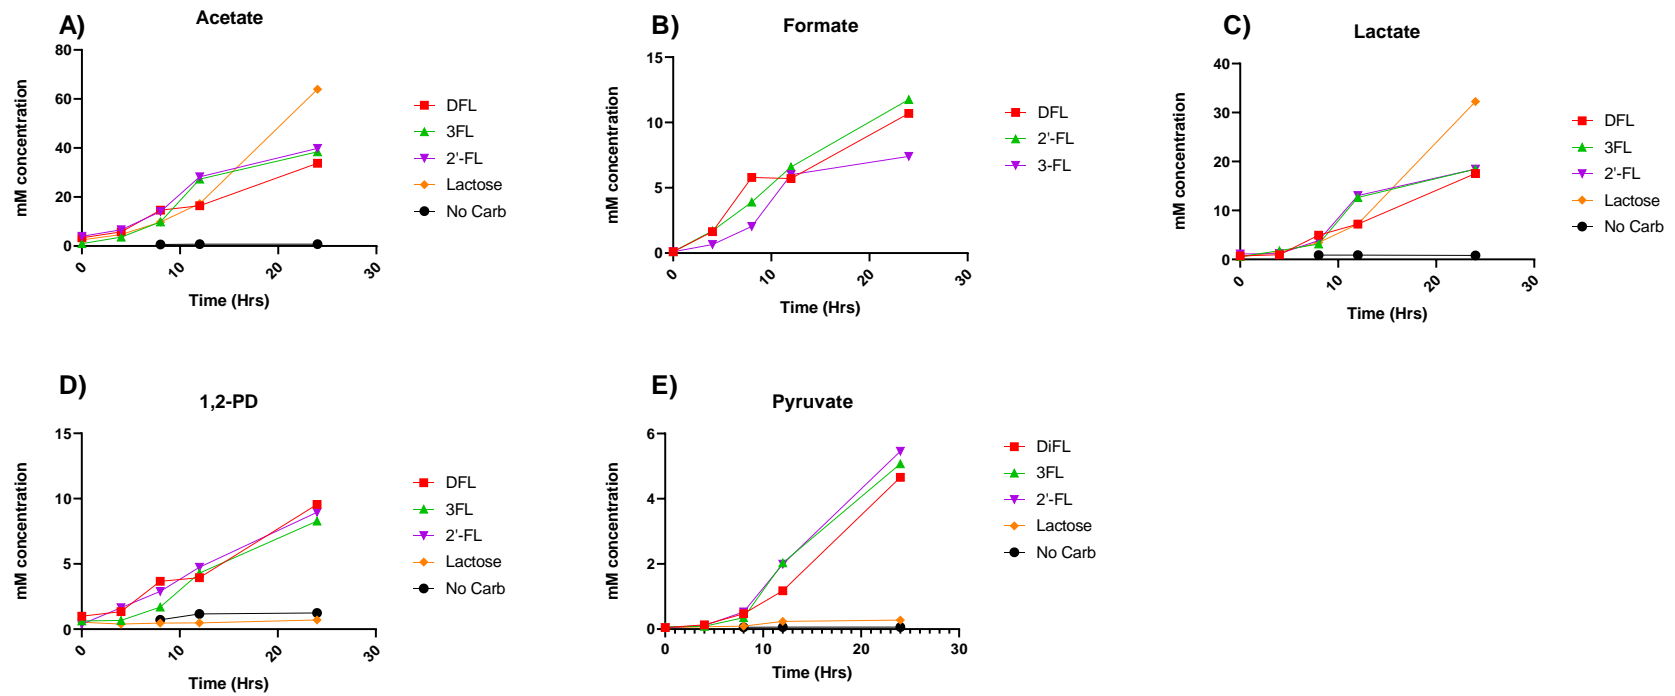

**Supplemental Figure 1:** Metabolite data for Bi-26 growth on FLs. Acetate (A), Formate (B), Lactate (C), 1,2-PD (D), and pyruvate (E) were measured over the 24-hour growth period. Two replicates of each timepoint were taken at T1-T4.

A)

| <b>Acetate:Lactate</b> | <b>3-FL</b> | <b>2'-FL</b> | <b>diFL</b> | <b>Lactose</b> |
|------------------------|-------------|--------------|-------------|----------------|
| ATCC15697              | 4.75:1      | 4.37:1       | 9.33:1      | 1.75:1         |
| Bi-26                  | 2.08:1      | 2.15:1       | 1.92:1      | 1.98:1         |

B)

| <b>Lactate:Formate</b> | <b>3-FL</b> | <b>2'-FL</b> | <b>diFL</b> |
|------------------------|-------------|--------------|-------------|
| ATCC15697              | 0.52:1      | 0.38:1       | 0.33:1      |
| Bi-26                  | 2.49:1      | 1.57:1       | 1.64:1      |

**Supplemental Table 3:** Ratios of acetate to lactate (A) and lactate to formate (B) for Bi-26 and ATCC15697 for the different carbon sources.

A)

PCA for Bi-26 All Growth Phases; Lactose and FLs

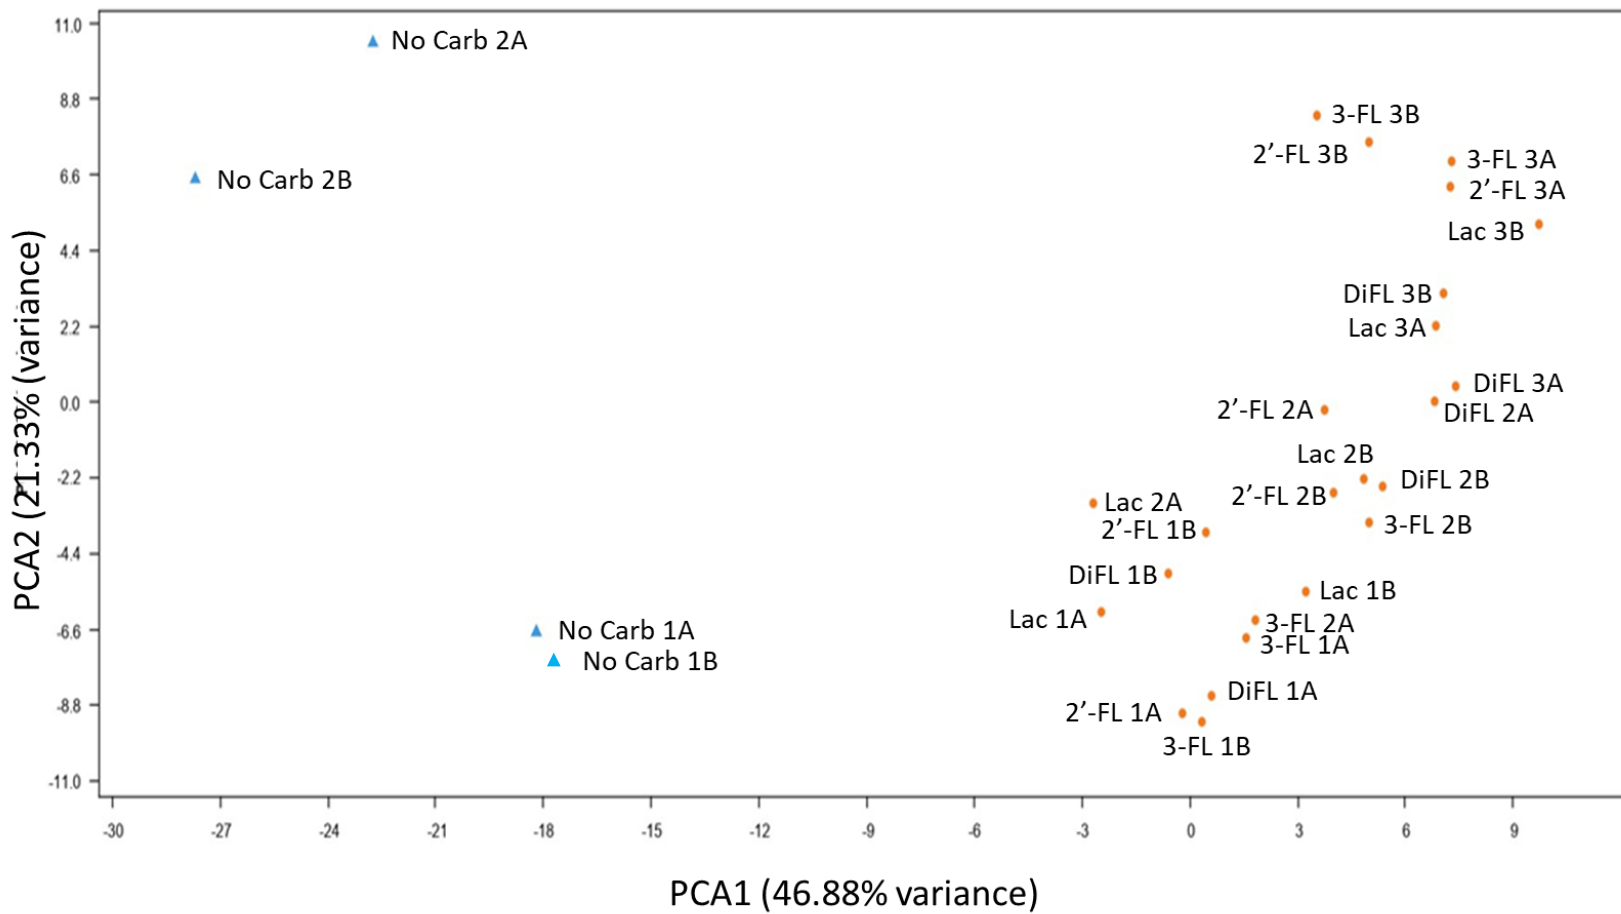

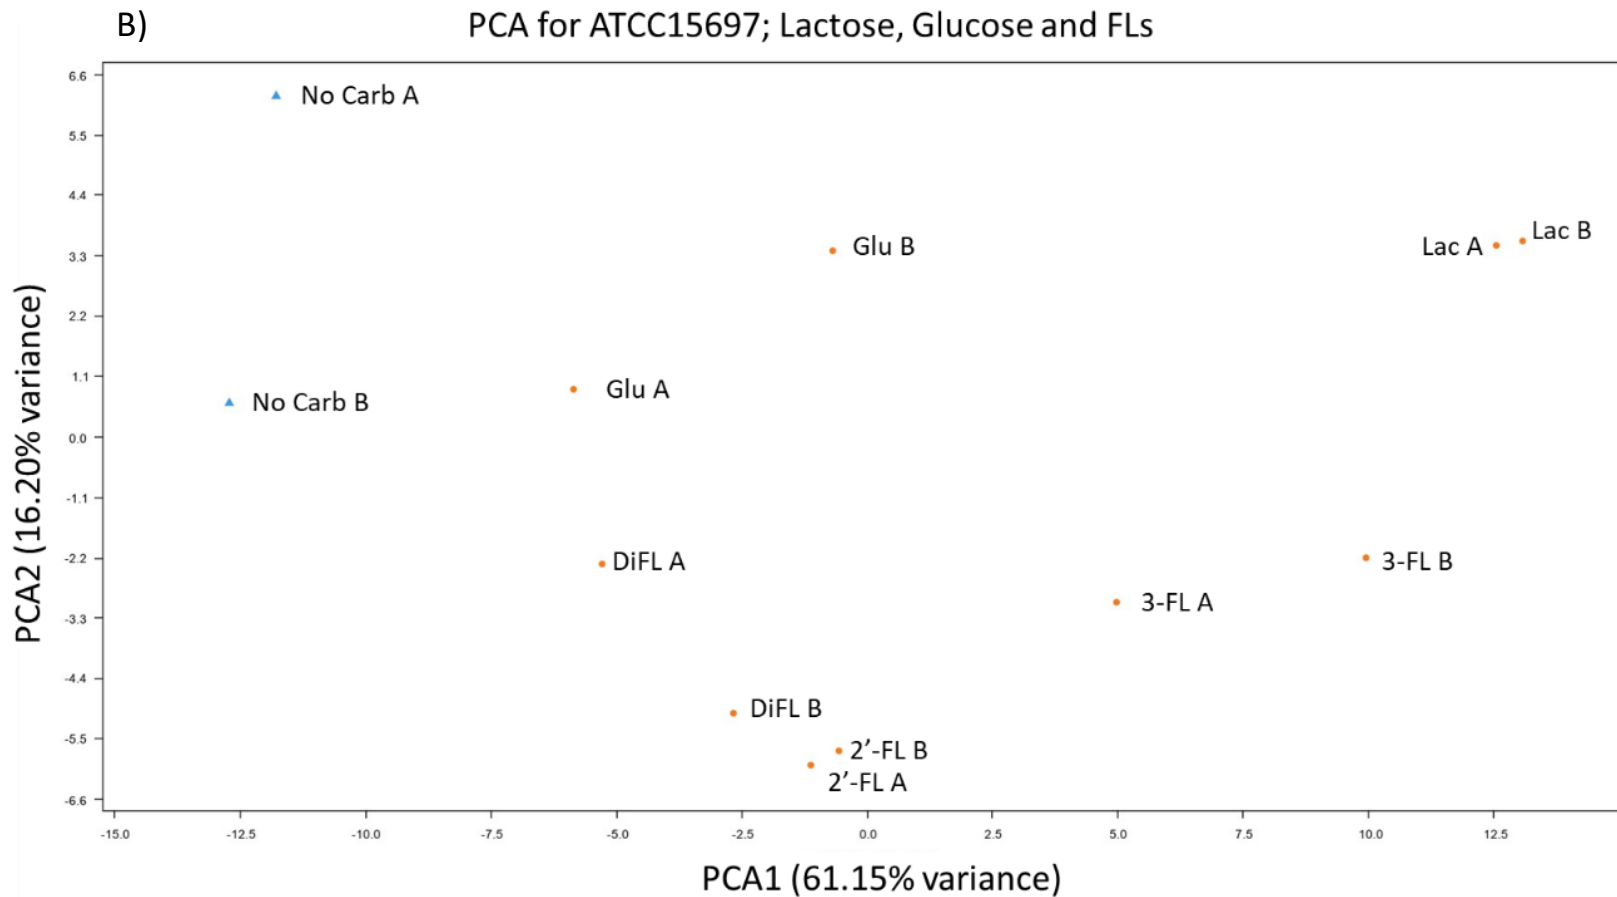

**Supplemental Figure 2.** PCA plot of Bi-26 (A) and ATCC 15697 (B) transcriptomes for lactose, glucose, FLs and the no carbohydrate control to show their likeness. The Bi-26 samples at time points T1, T2 and T3 are signified by 1, 2, and 3. Biological replicates are signified by the letters A and B. A single time point for each carbon source was analyzed for ATCC15697, corresponding to T2.

# Bi-26

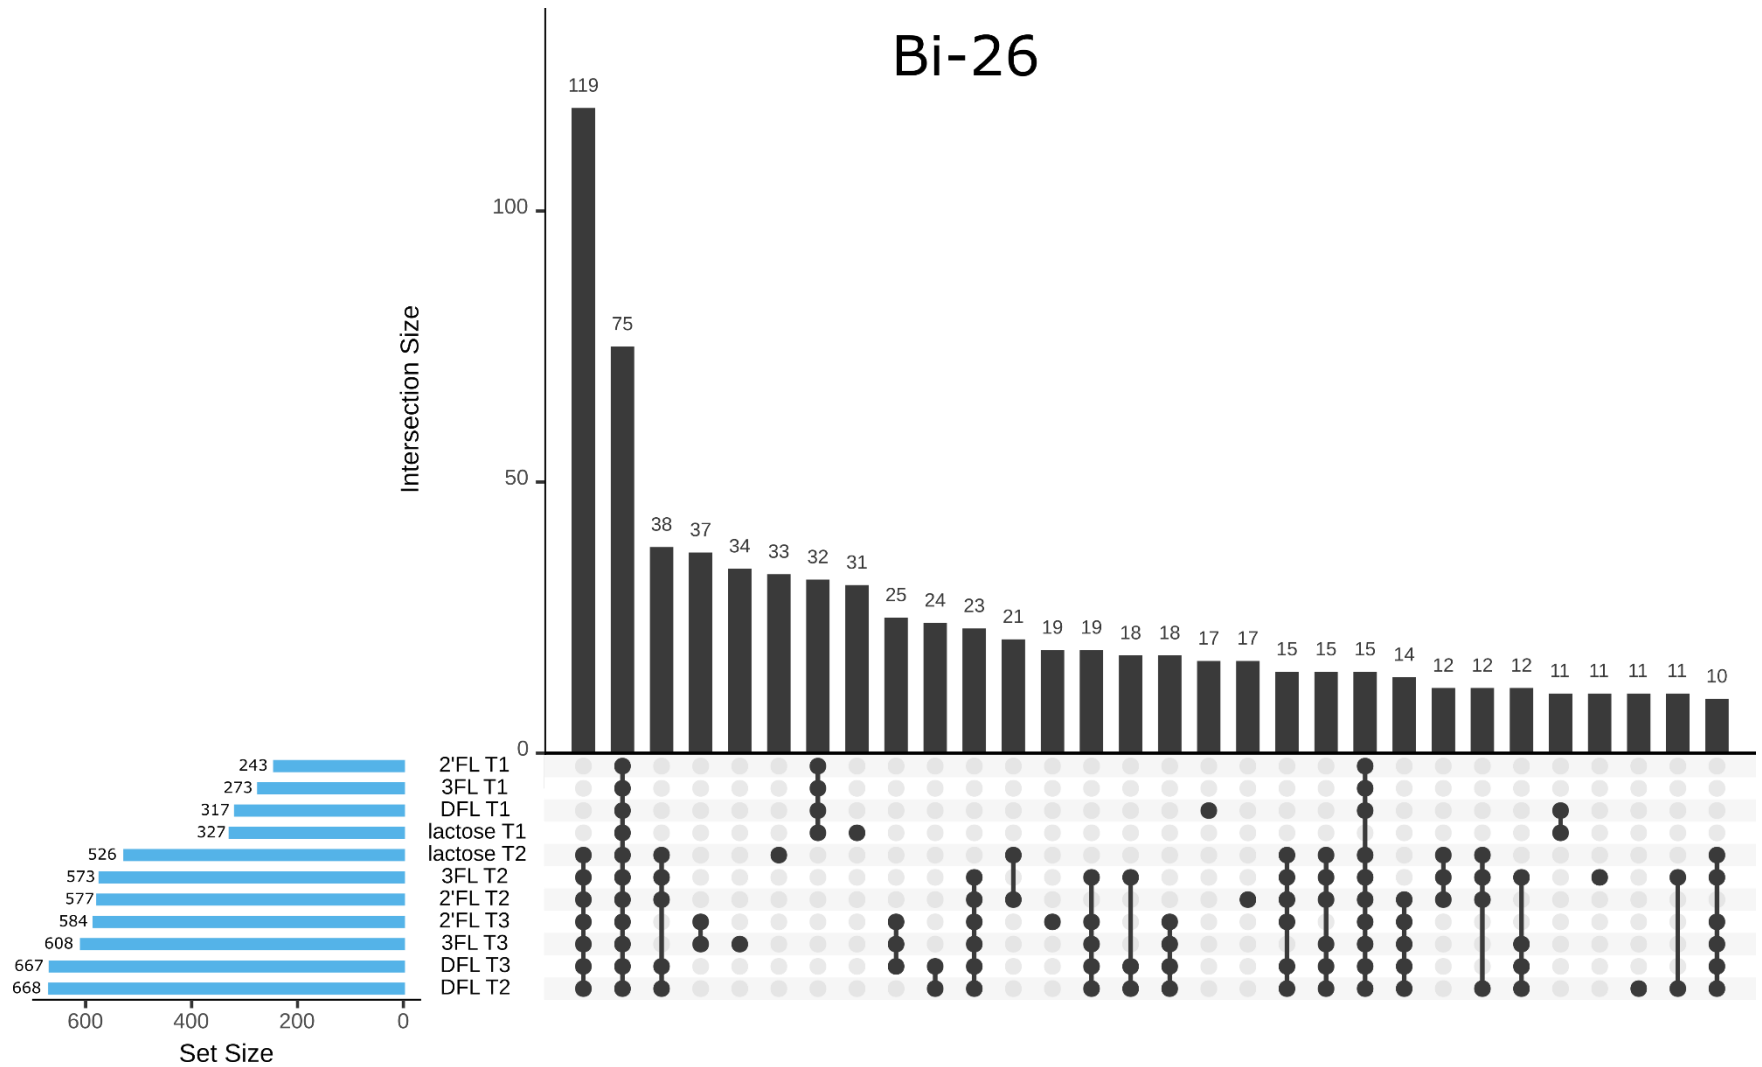

**Supplemental Figure 3.** Upset diagram of differential gene counts (DEGs) for all conditions that were tested for Bi-26. Total number of DEGs is shown on the left (blue bars) for each of the conditions while the number of shared genes per condition (shown by the connected dots), is located on the black bars.



A

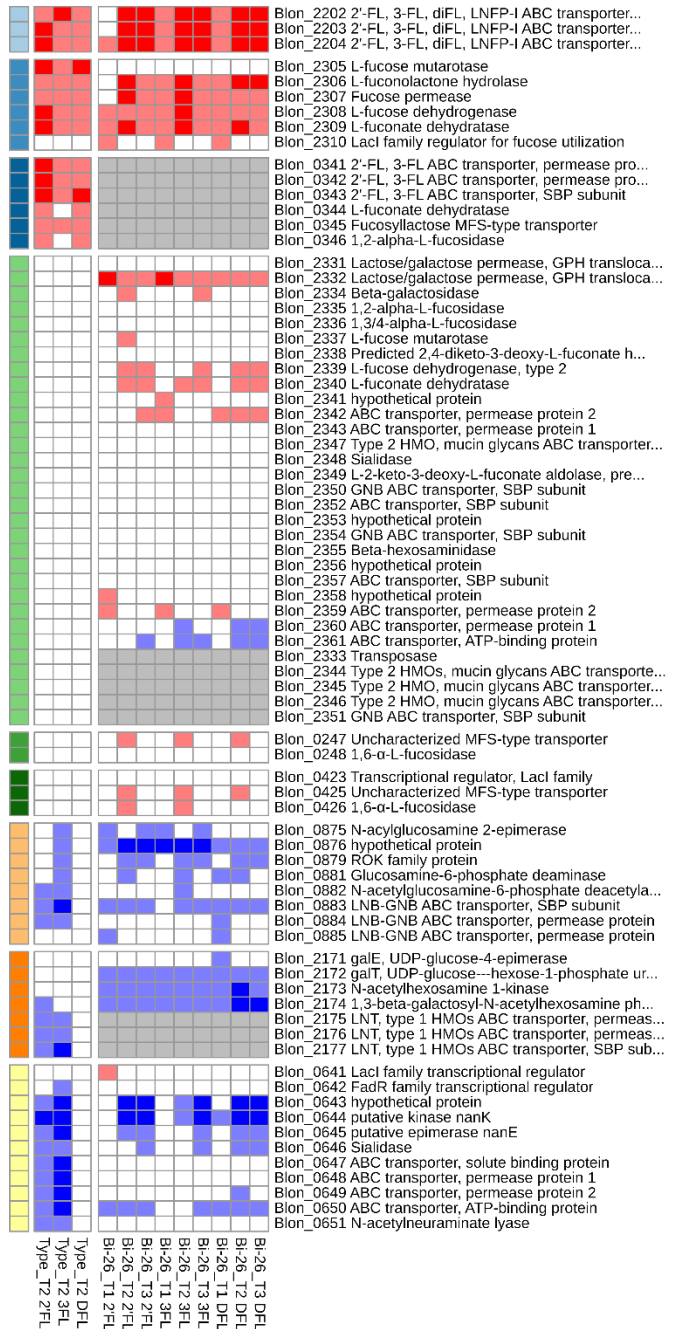

B

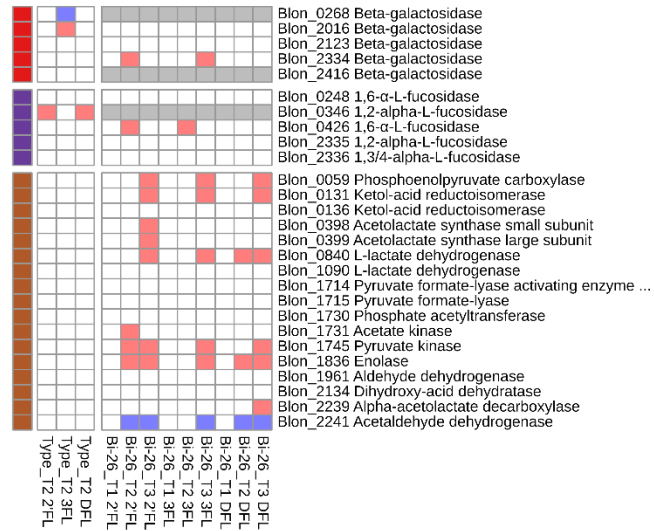

## Gene cluster

- Fucosyllactose-1
- Fucosyllactose-2
- Fucosyllactose-3
- HMO-1
- HMO-2
- HMO-3
- LNB-GNB, blood group glycans
- LNT, type 1 HMOs, LNB-GNB
- Sialylated glycans

## Functional Group

- Beta-galactosidase
- Fucosidase
- Pyruvate metabolism

## Log2 Fold Change

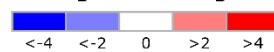

**Supplemental Figure 4.** Differential expression of the HMO utilization genes within the global transcriptomes of ATCC 15697 and Bi-26 (additional timepoint shown) strains grown on 2'FL, 3FL, or DFL shown as log<sub>2</sub>-fold change. Transcriptomes of cultures grown in mBasal medium with no carbon source added were used as a reference. A fold change  $\geq 1.5$ -fold and Benjamini–Hochberg adjusted p-value  $< 0.05$  were considered for statistical significance. Orthologous genes between the Bi-26 and ATCC 15697 are shown on the same rows and are identified by Blon IDs. **Panel A:** Differential expression of the gene loci implicated in recognition, internalization, and intracellular hydrolysis of fucosyllactose and several other HMO species in *B. longum* subsp. *infantis*. Genes are shown in the order on the chromosome. General HMO specificity of each locus is color-coded on the left. In gray are the orthologs of ATCC 15697 genes missing from the genome of Bi-26. Most of the missing genes are transporter systems for various HMOs, which underscores the Bi-26 apparent preference for 2'FL, 3FL, and DFL utilization. Upregulation of the L-fucose utilization genes in the HMO-1 cluster in Bi-26, but not in ATCC 15697 is another indication of a regulatory adaptation to preferential utilization of small fucosylated HMOs by Bi-26. **Panel B:** Differential expression of metabolic genes involved in utilization of 2'FL, 3FL, DFL and their constituent monosaccharides. See Supplemental Table 2 for explanation of abbreviations.
